# Supplementary material for: Trends in Sexually Transmitted Infections in United States Ambulatory Care Clinics from 2005–2016
Source: MDPI journal article supplement (doi:10.3390/jcm11010071), 2021-12-24
Supplement: s1 [file s1]

**Table S1.** Table of HPV-related visits by sex.

| Year of Diagnosis | HPV-Related Visits by Sex <i>N</i> % (95% CI) |                     |
|-------------------|-----------------------------------------------|---------------------|
|                   | Male                                          | Female              |
| 2005–2008         | 23.27 (4.54–42.00)                            | 76.73 (58.00–95.46) |
| 2009–2012         | 39.71 (27.18–52.25)                           | 60.29 (47.75–72.82) |
| 2013–2016         | 47.87 (31.88–63.87)                           | 52.13 (36.13–68.12) |

HPV: Human Papillomavirus.

**Table S2.** Unweighted Number of STI-related office visits by HIV status.

| Year of Diagnosis | STI-Related Visits by HIV Status |         |
|-------------------|----------------------------------|---------|
|                   | HIV                              | Non-HIV |
| 2005–2008         | 1                                | 109     |
| 2009–2012         | 8                                | 233     |
| 2013–2016         | 6                                | 240     |

HIV: Human Immunodeficiency Virus. Note: National Center for Health Statistics recommends reporting unweighted frequencies when they are <30.

**Table S3.** Crude odds-ratios of risk factors and STI-related visits using data from NAMCS.

| Variables                                       | Crude Odds ratio (95% CI) |
|-------------------------------------------------|---------------------------|
| Year of diagnosis (ref: 2005–2008)              |                           |
| 2009–2012                                       | <b>1.66 (1.19–2.32)</b>   |
| 2013–2016                                       | <b>1.75 (1.24–2.49)</b>   |
| Patient age categories (ref: 45–65 years)       |                           |
| 15–24 years                                     | <b>4.45 (3.19–6.34)</b>   |
| 25–44 years                                     | <b>3.63 (2.74–4.84)</b>   |
| Sex (ref: Male)                                 |                           |
| Female                                          | 1.05 (0.80–1.39)          |
| Race (ref: White)                               |                           |
| Black                                           | <b>2.67 (1.98–3.61)</b>   |
| Other                                           | 1.11 (0.66–1.86)          |
| Patient ethnicity (ref: Non-Hispanic or Latino) |                           |
| Hispanic or Latino                              | 1.37 (0.99–1.89)          |
| Insurance (ref: Medicaid/Medicare)              |                           |
| Private                                         | <b>0.68 (0.49–0.94)</b>   |
| Others                                          | 0.80 (0.48–1.33)          |
| Region (ref: Midwest)                           |                           |
| Northeast                                       | 0.94 (0.63–1.40)          |
| South                                           | <b>1.45 (1.06–1.97)</b>   |
| West                                            | 1.17 (0.79–1.73)          |
| HIV vs. Non-HIV                                 | <b>14.3 (7.49–27.45)</b>  |

STI: sexually transmitted infection; NAMCS: National Ambulatory Medical Care Survey; CI: confidence interval; HIV: human immunodeficiency virus; ref: reference. Boldface indicates statistical significance ( $p < 0.05$ ).
